# Supplementary material for: Structural Determinants of HPV Vaccination Inequalities: A Multiregional Analysis across Six WHO Regions
Source: Research Square preprint supplement (doi:10.21203/rs.3.rs-7654138/v1), 2025-10-16
Supplement: Supplementary file 1 [file 8e11b68fa3fb40d1a031633f.docx]

**Supplementary**


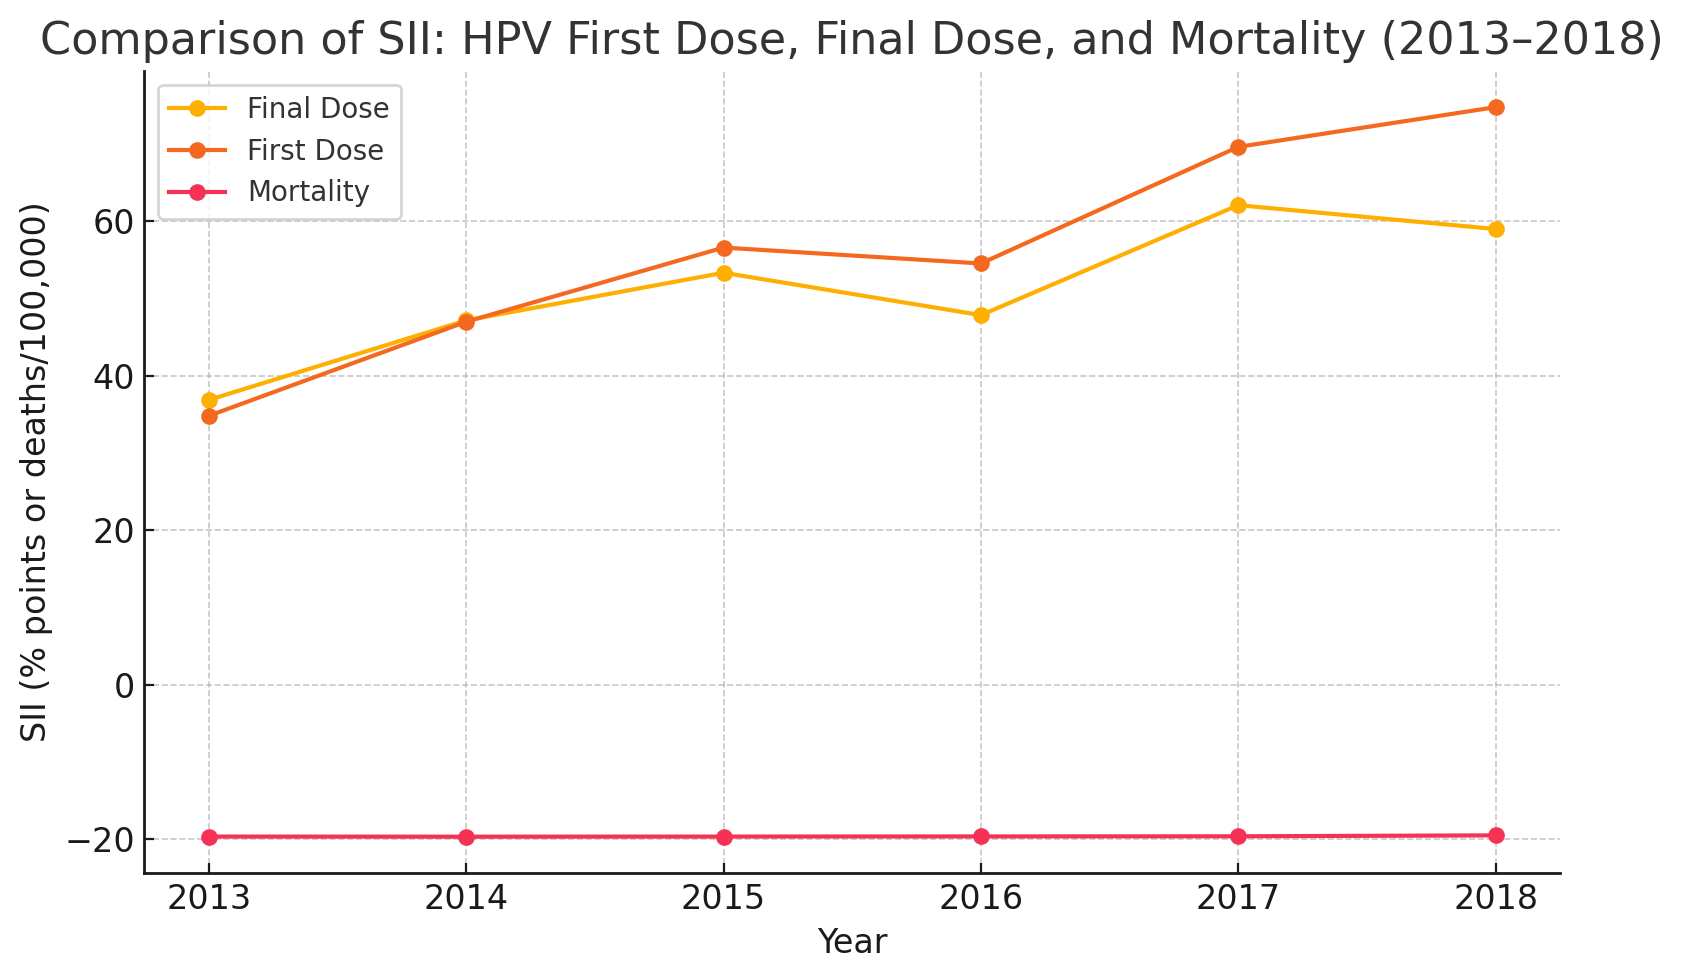


**Figure S1.** Comparison of SII trends in HPV first-dose coverage, final-dose coverage, and cervical cancer mortality (2013–2018)
